# Supplementary material for: University-Wide Digital Skills Training: A Case Study Evaluation
Source: MDPI journal article supplement (doi:10.3390/educsci13040333), 2023-03-23
Supplement: s1 [file s1]

Archive with 2 entries (2 files):
- Table S1.pdf
- Table S2.pdf
