# Supplementary material for: University-Wide Digital Skills Training: A Case Study Evaluation
Source: MDPI journal article supplement (doi:10.3390/educsci13040333), 2023-03-23
Supplement: s1 [file s1 › Table S2.pdf]

## Supplemental Online Material S2

| Level        | Response Scale                                                                                                                                    | Questions                                                                                                                                                                                                                                                                                                                                                                                                                                                                                                                                                                                                                                                                                                                                                                                                                                                                                                                                                                                                                                                                                                                                                               |
|--------------|---------------------------------------------------------------------------------------------------------------------------------------------------|-------------------------------------------------------------------------------------------------------------------------------------------------------------------------------------------------------------------------------------------------------------------------------------------------------------------------------------------------------------------------------------------------------------------------------------------------------------------------------------------------------------------------------------------------------------------------------------------------------------------------------------------------------------------------------------------------------------------------------------------------------------------------------------------------------------------------------------------------------------------------------------------------------------------------------------------------------------------------------------------------------------------------------------------------------------------------------------------------------------------------------------------------------------------------|
| Reaction (1) | Agreement with statement<br>1 = Strongly disagree,<br>5 = Strongly agree.                                                                         | Overall I am satisfied with the Essential Digital Skills training<br>The Essential Digital Skills training was an effective use of my time<br>The Essential Digital Skills training covered enough material<br>The material covered in the Essential Digital Skills training was the correct level for me<br>The material covered in Essential Digital Skills training met my needs as a student at [Host University]<br>The style of the Essential Digital Skills training (self-paced and online) worked for me<br>The Essential Digital Skills training motivated me to continue developing my digital skills<br>I would recommend the Essential Digital Skills training to a friend                                                                                                                                                                                                                                                                                                                                                                                                                                                                                 |
| Learning (2) | Agreement with statement<br>1 = Strongly disagree,<br>5 = Strongly agree.<br><br>Current skill level<br>1= no skill at all,<br>10 = expert level. | I have gained the key digital skills I needed to learn for my studies<br>I have gained the key digital skills I needed to learn for employability<br>I feel I can apply what I have learnt to support my studies at [Host University]<br>I have gained the key digital skills I needed to learn for my studies<br><br>Digital Identity & wellbeing e.g. understanding your digital footprint<br>Digital Learning & development e.g. using the institutional VLE and [Host University] apps to support learning<br>ICT productivity and proficiency e.g. using tools like Office365 and organising digital files<br>Information, media and data literacy e.g. locating sources from referencing, accessing information and data security and evaluating media sources<br>Digital creation, problem solving and innovation e.g. producing a powerpoint presentation, carrying online research and reflecting on your digital practices<br>Digital communication, collaboration and participation e.g. using the institutional VLE forums to work with others and utilising shared documents<br><br>Digital Identity & wellbeing e.g. understanding your digital footprint |

## Supplemental Online Material S2

|                    |                                                                                                                                                                    |                                                                                                                                                                                                                                                                                                                                                                                                                                                                                                                                                                                                                                                                                                                       |
|--------------------|--------------------------------------------------------------------------------------------------------------------------------------------------------------------|-----------------------------------------------------------------------------------------------------------------------------------------------------------------------------------------------------------------------------------------------------------------------------------------------------------------------------------------------------------------------------------------------------------------------------------------------------------------------------------------------------------------------------------------------------------------------------------------------------------------------------------------------------------------------------------------------------------------------|
|                    | <p>Extent to which the Essential Digital Skills training was important in developing the skill level</p> <p>1 = not at all important, 5 = extremely important.</p> | <p>Digital Learning &amp; development e.g. using the institutional VLE and [Host University] apps to support learning.</p> <p>ICT productivity and proficiency e.g. using tools like Office365 and organising digital files</p> <p>Information, media and data literacy e.g. locating sources from referencing, accessing information and data security and evaluating media sources</p> <p>Digital creation, problem solving and innovation e.g. producing a powerpoint presentation, carrying online research and reflecting on your digital practices</p> <p>Digital communication, collaboration and participation e.g. using the institutional VLE forums to work with others and utilising shared documents</p> |
|                    | Free text                                                                                                                                                          | What is the biggest change you've noticed in your studies so far with the new skills you developed or learnt on the Essential Digital Skills training?                                                                                                                                                                                                                                                                                                                                                                                                                                                                                                                                                                |
| Behaviour (3)      | <p>Agreement with statement</p> <p>1 = Strongly disagree, 5 = Strongly agree.</p>                                                                                  | <p>I am using what I learnt on the Essential Digital Skills training on a daily basis in my studies</p> <p>I am using what I have learnt on the Essential Digital Skills training when I apply for jobs or further study</p> <p>I have been able to help others by teaching them some of what I have learnt on the Essential Digital Skills Training</p> <p>I feel motivated to keep using the skills I have learnt in the Essential Digital Skills training</p>                                                                                                                                                                                                                                                      |
| Results/Impact (4) | <p>Agreement with statement</p> <p>1 = Strongly disagree, 5 = Strongly agree.</p>                                                                                  | <p>Since engaging with the Essential Digital Skills training, I feel I am more productive in my studies, making fewer errors and getting work done more quickly and efficiently</p> <p>Since engaging with the Essential Digital Skills training, I have wasted less time dealing with technical or digital problems</p> <p>Since engaging with the Essential Digital Skills training, I have not had to ask others for as much help with technical or digital problems</p> <p>The Essential Digital Skills training has helped me in achieving my study goals so far</p>                                                                                                                                             |

## Supplemental Online Material S2

The Essential Digital Skills training has helped me in achieving my goals related to employment or personal development so far

The Essential Digital Skills training has helped improve my attainment/performance on assessed work

The Essential Digital Skills training has increased my confidence in the digital world

The Essential Digital Skills training has strengthened my sense of belonging towards [Host University]

---
